# Supplementary material
Source: HighWire-hosted journal article supplement (http://dmd.aspetjournals.org/highwire/filestream/65919/field_highwire_adjunct_files/4/DMD25759_Supplemental_Fig_5.pdf)

Supplemental Figure 5. 24OHChol-24-sulfate bound in the SULT2A1 dimer with the 3-OH oriented towards the PAP molecule. The second two orientations with the lowest BFE are shown. PAP is shown in yellow (note PAP molecule in each SULT2A1 monomer). 24OHChol is shown in magenta and the sulfonate is in cyan.

#2

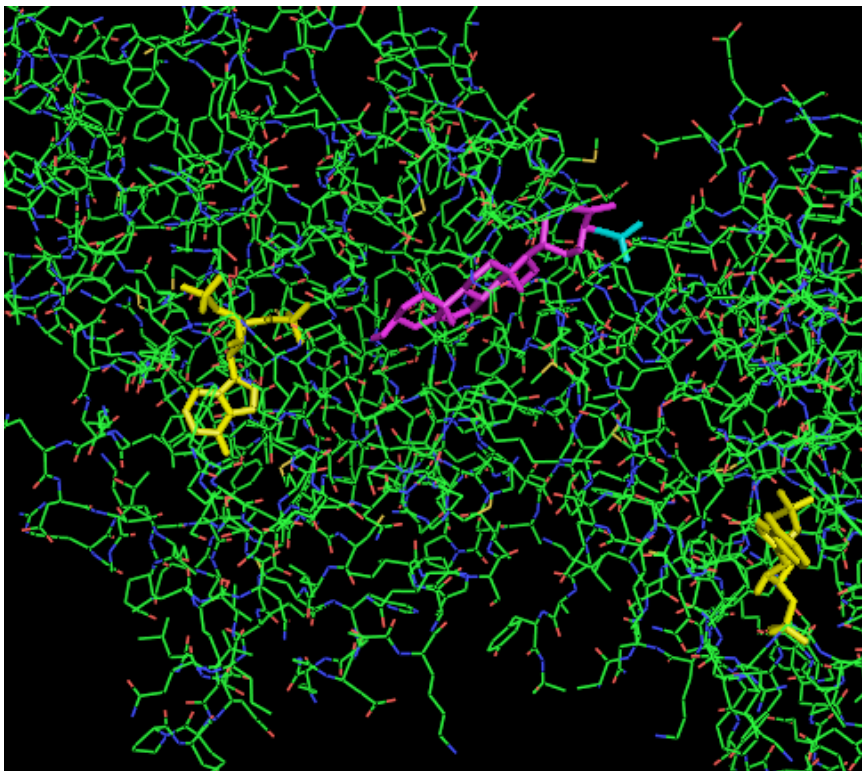

#3

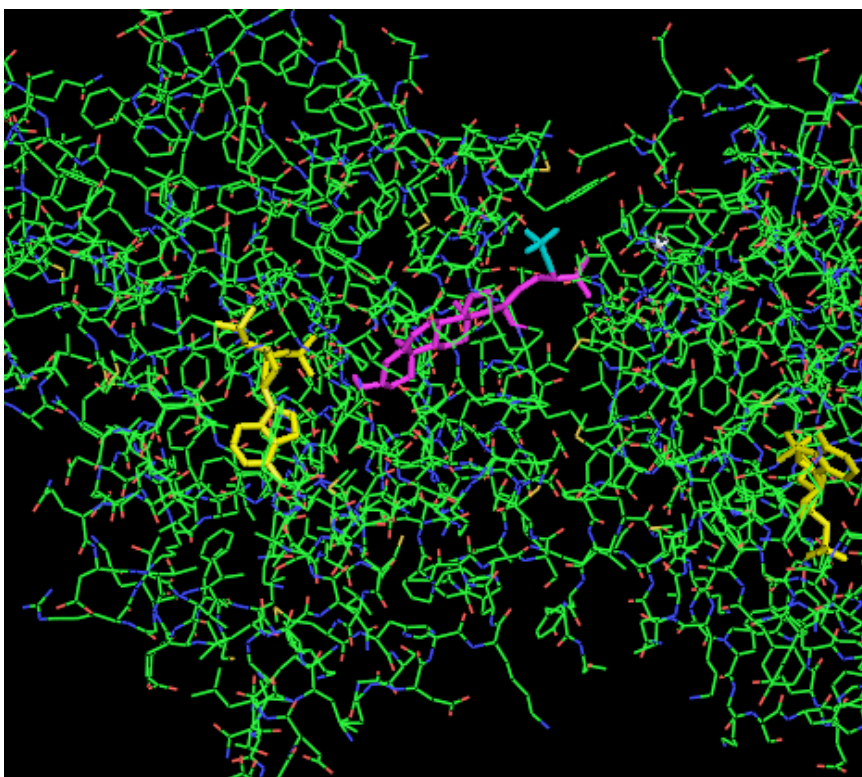

Supplement: DMD25759_Supplemental_Fig_5.pdf [file DMD25759_Supplemental_Fig_5.pdf]
